# Supplementary material for: Induction, Flavonoids Contents, and Bioactivities Analysis of Hairy Roots and True Roots of Tetrastigma hemsleyanum Diels et Gilg
Source: MDPI journal article supplement (doi:10.3390/molecules28062686), 2023-03-16
Supplement: s1 [file s1]

# Supplementary Materials

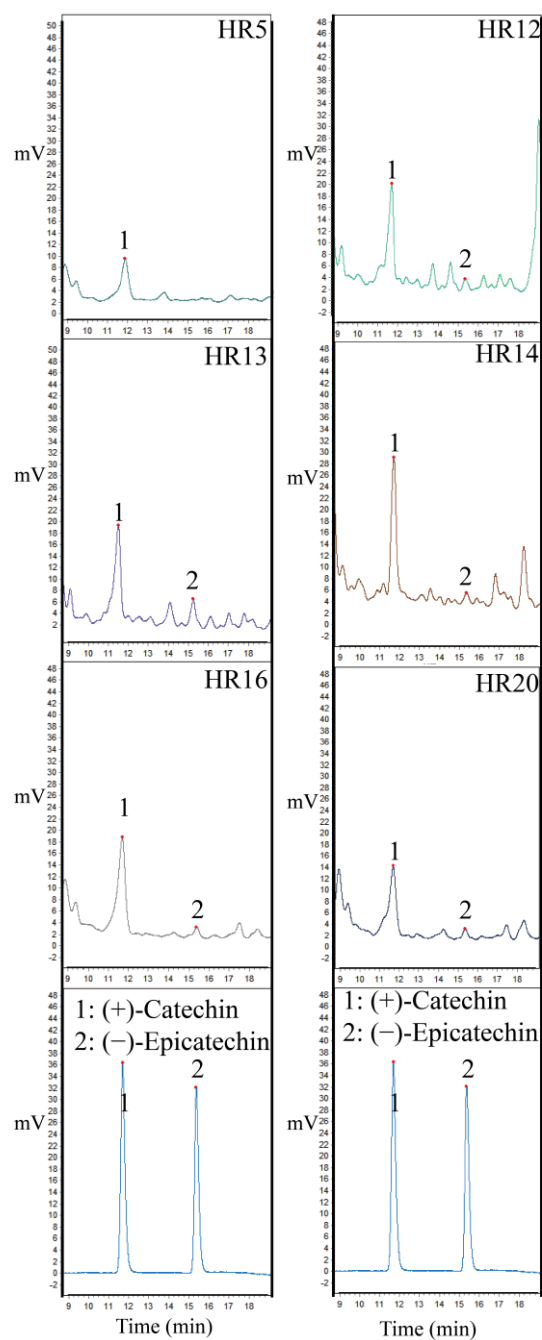

**Figure S1.** (+)-Catechin and (-)-epicatechin contents of *T. hemsleyanum* hairy root lines as determined by HPLC. PubChem CID of (+)-catechin (1) is 9064. PubChem CID of (-)-epicatechin (2) is 72276.

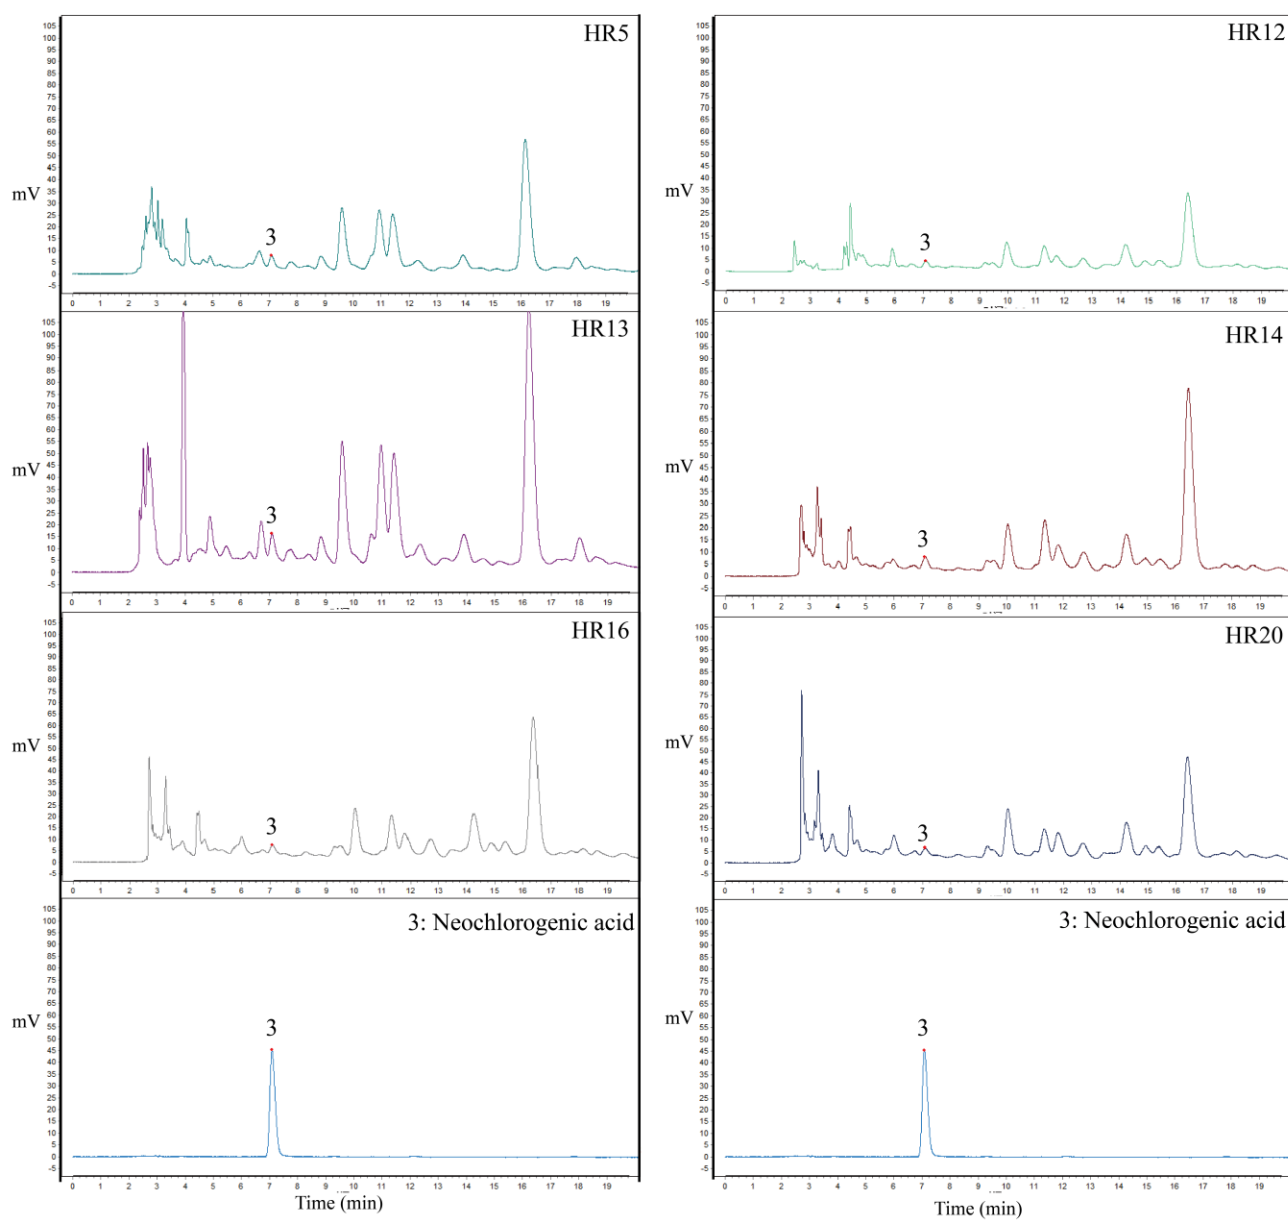

**Figure S2.** Neochlorogenic acid contents of *T. hemsleyanum* hairy root lines as determined by HPLC. PubChem CID of neochlorogenic acid (3) is 5280633.

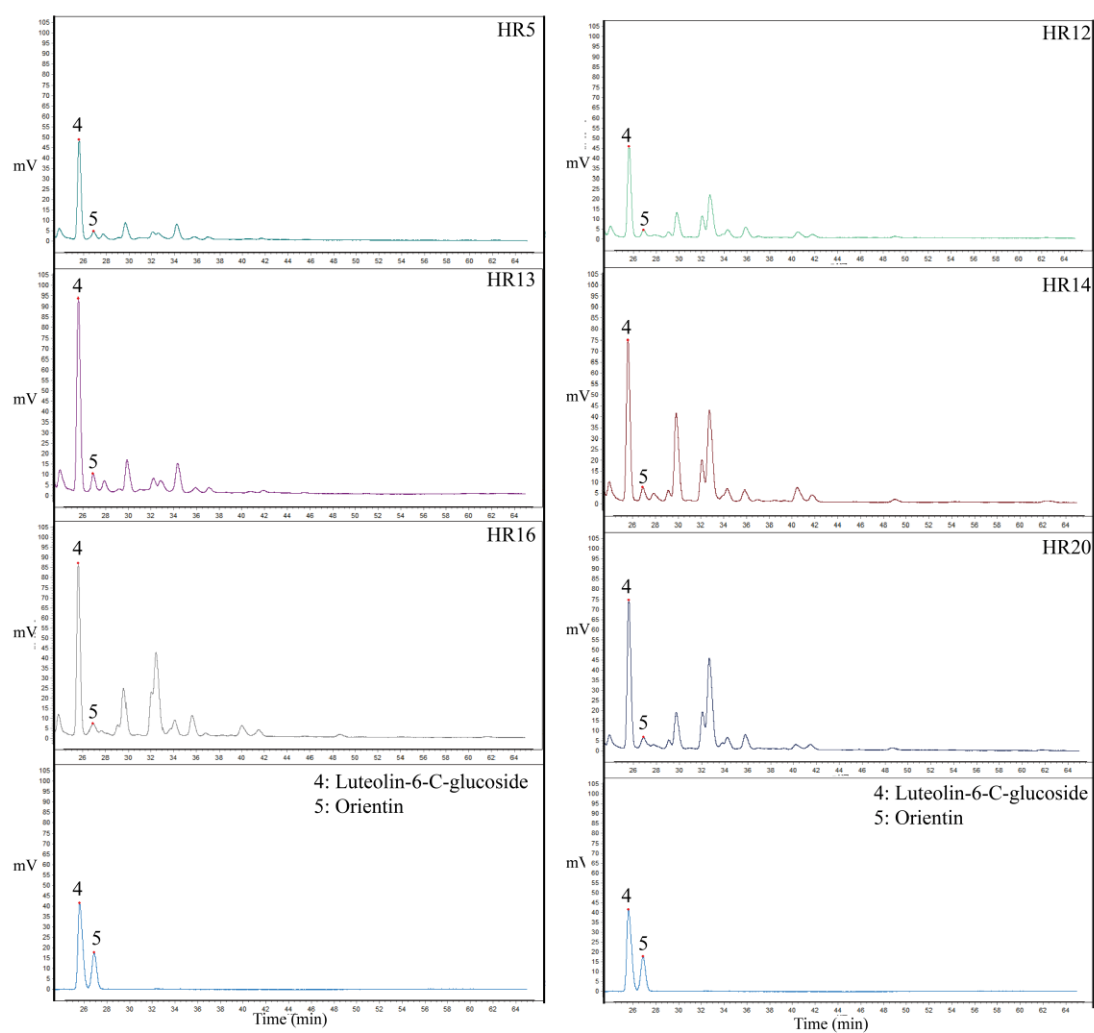

**Figure S3.** Luteolin-6-C-glucoside and orientin contents of *T. hemsleyanum* hairy root lines as determined by HPLC. PubChem CID of luteolin-6-C-glucoside (4) is 114776. PubChem CID of orientin (5) is 5281675.

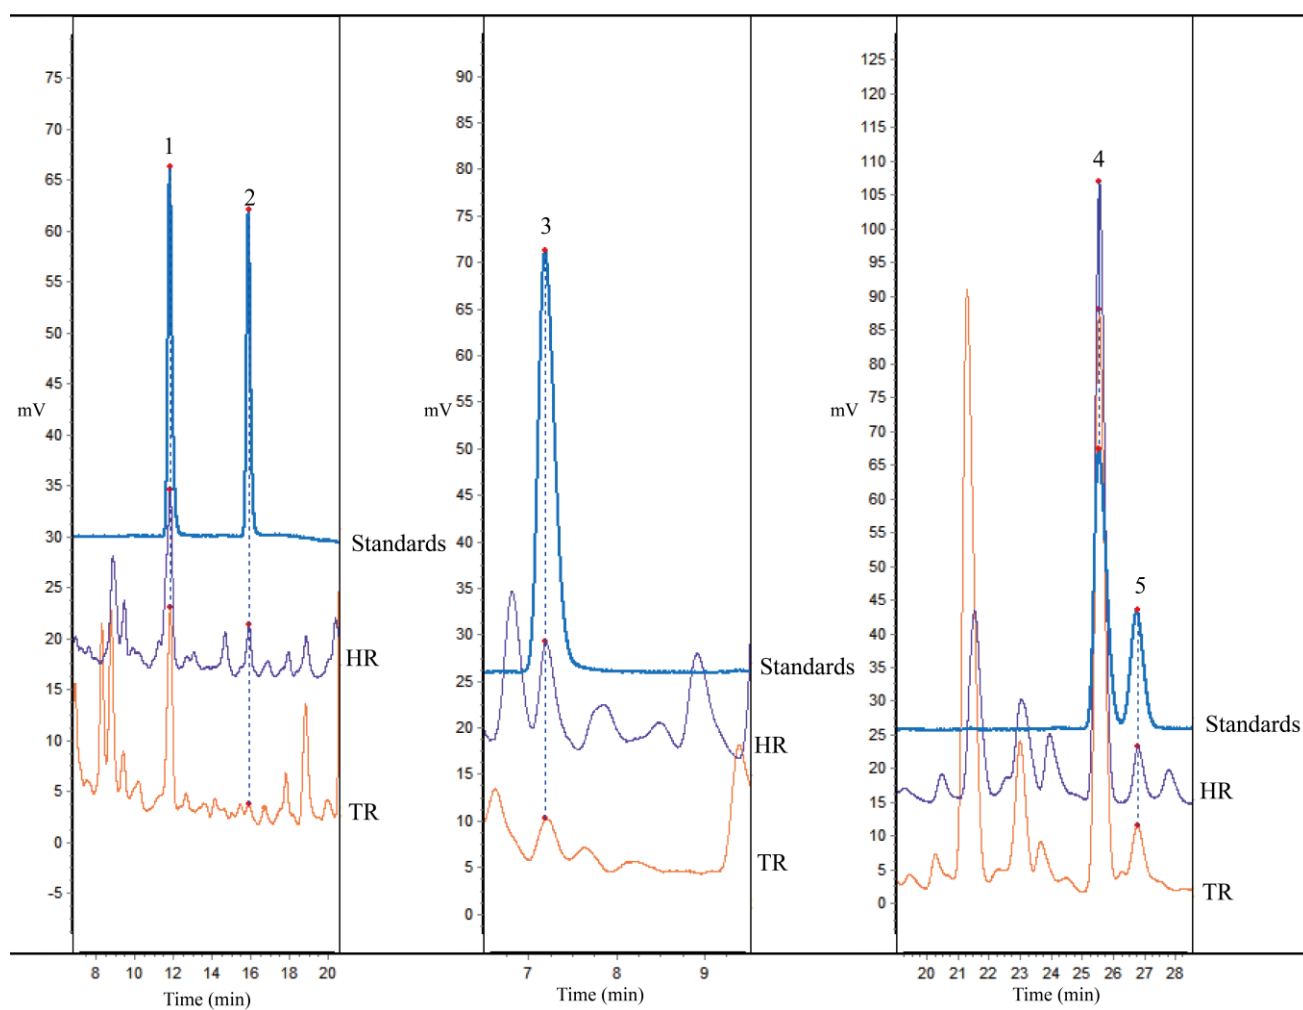

**Figure S4.** Flavonoids contents of hairy roots (HR) and true roots (TR). PubChem CID of (+)-catechin (1) is 9064. PubChem CID of (-)-epicatechin (2) is 72276. PubChem CID of neochlorogenic acid (3) is 5280633. PubChem CID of luteolin-6-C-glucoside (4) is 114776. PubChem CID of orientin (5) is 5281675.

**Table S1.** The chemical composition of MS, 1/2 MS, 1/4 MS, B5, and N6 medium.

| Chemical composition name         | The Content of Each Compound (mg/L) |        |        |           |         |
|-----------------------------------|-------------------------------------|--------|--------|-----------|---------|
|                                   | MS                                  | 1/2 MS | 1/4 MS | B5        | N6      |
| Potassium Nitrate                 | 1900.00                             | 950.00 | 475.00 | 2500.00   | 2800.00 |
| Ammonium Nitrate                  | 1650.00                             | 825.00 | 412.50 | 0.00      | 463.00  |
| Potassium Phosphate<br>Monobasic  | 170.00                              | 85.00  | 42.50  | 150.00    | 400.00  |
| Magnesium Sulfate                 | 370.00                              | 185.00 | 92.50  | 122.09    | 185.00  |
| Calcium Chloride                  | 440.00                              | 220.00 | 110.00 | 113.24.00 | 165.00  |
| Potassium Iodide                  | 0.83                                | 0.83   | 0.83   | 0.75      | 0.80    |
| Boric Acid                        | 6.20                                | 6.20   | 6.20   | 3.00      | 1.60    |
| Manganese Sulfate                 | 22.3                                | 22.3   | 22.3   | 10        | 4.4     |
| Zinc Sulfate                      | 8.60                                | 8.60   | 8.60   | 2.00      | 1.50    |
| Sodium Molybdate                  | 0.25                                | 0.25   | 0.25   | 0.25      | 0.00    |
| Cupric Sulfate                    | 0.025                               | 0.025  | 0.025  | 0.025     | 0.00    |
| Cobalt Chloride·6H <sub>2</sub> O | 0.025                               | 0.025  | 0.025  | 0.025     | 0.00    |
| Na <sub>2</sub> EDTA              | 37.30                               | 37.30  | 37.30  | 37.30     | 37.30   |
| Ferrous Sulfate                   | 27.80                               | 27.80  | 27.80  | 27.80     | 27.80   |
| Myo-Inositol                      | 100.00                              | 100.00 | 100.00 | 100.00    | 0.00    |
| Glycin                            | 2.00                                | 2.00   | 2.00   | 0.00      | 2.00    |
| Thiamine·HCL                      | 0.10                                | 0.10   | 0.10   | 10.00     | 1.00    |
| Pyridoxine·HCL                    | 0.50                                | 0.50   | 0.50   | 1.00      | 0.50    |
| Nicotinic Acid                    | 0.50                                | 0.50   | 0.50   | 1.00      | 0.50    |
| Ammonium Sulfate                  | 0.00                                | 0.00   | 0.00   | 134.00    | 0.00    |
